# Supplementary material
Source: Springer Nature journal article supplement (https://www.springermedizin.de/resource/supplementary/12888_2013_1455_MOESM3_ESM.pdf/9480276)

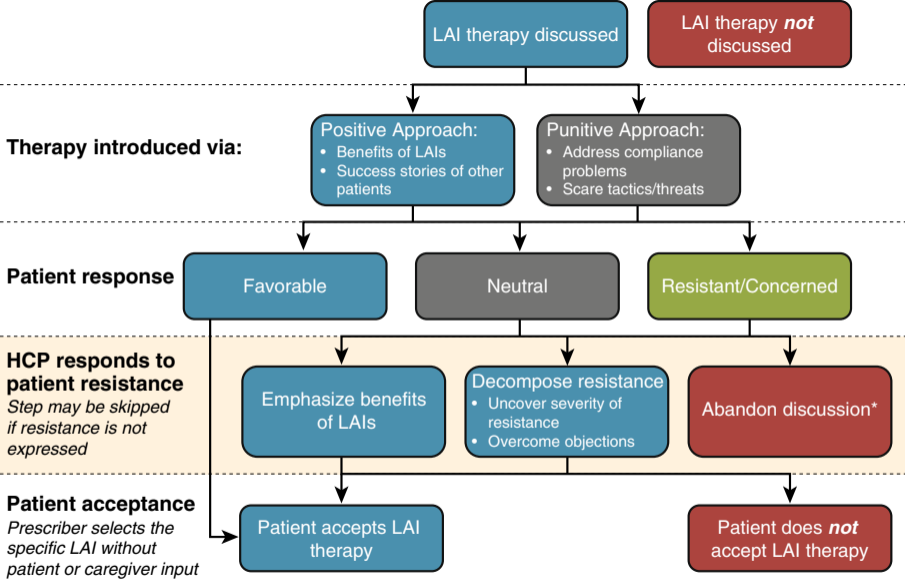

*Ideal conversation path*    ■ ■ ■ ■    *LAI initiation barrier*

Supplement: MOESM3 [file 9480276]
